# Supplementary material for: Evaluation of AA-CVD deposited phase pure polymorphs of SnS for thin films solar cells
Source: Royal Society of Chemistry journal article supplement (doi:10.1039/c9ra01938c), 2019-01-01
Supplement: c9ra01938c1.pdf [file c9ra01938c1.pdf]

## **Evaluation of AA-CVD Deposited Phase Pure Polymorphs of SnS for Thin Films Solar Cells**

Ibbi Y. Ahmet<sup>a\*</sup>, Maxim Guc<sup>b</sup>, Yudania Sánchez<sup>b</sup>, Markus Neuschitzer<sup>b</sup>, Victor Izquierdo-Roca<sup>b</sup>, Edgardo Saucedo<sup>b</sup>, and Andrew L. Johnson<sup>a\*</sup>

<sup>a</sup>Department of Chemistry and Centre for Sustainable Chemical Technologies, University of Bath, Bath BA2 7AY, United Kingdom. Email: [ibrahim.ahmet@helmholtz-berlin.de](mailto:ibrahim.ahmet@helmholtz-berlin.de), [A.L.Johnson@bath.ac.uk](mailto:A.L.Johnson@bath.ac.uk)

<sup>b</sup>Catalonia Institute for Energy Research (IREC), Jardins de les Dones de Negre 1, pl.2, 08930, St Adrià del Besòs, Barcelona, Spain.

# Supporting Information

**Table S1:** Summary of functional and shunted pixels per sample for as-deposited  $\alpha$ -SnS and  $\pi$ -SnS PV devices.

| Device Structure                                          | Treatment    | No. of Shunted Pixels | Number of Rectifying Pixels |
|-----------------------------------------------------------|--------------|-----------------------|-----------------------------|
| <b><math>\alpha</math>-SnS</b>                            |              |                       |                             |
| A1: Mo/ $\alpha$ -SnS /CdS/i-ZnO/ITO                      | As completed | 1                     | 5                           |
| A2: Mo/ $\alpha$ -SnS /CdS/i-ZnO/ITO                      | As completed | 15                    | 6                           |
| B1: FTO/ $\alpha$ -SnS/CdS/i-ZnO/ITO                      | As completed | 2                     | 8                           |
| B2: FTO/ $\alpha$ -SnS/CdS/i-ZnO/ITO                      | As completed | 10                    | 6                           |
| C1: FTO/am-TiO <sub>x</sub> / $\alpha$ -SnS/CdS/i-ZnO/ITO | As completed | 8                     | 2                           |
| C2: FTO/am-TiO <sub>x</sub> / $\alpha$ -SnS/CdS/i-ZnO/ITO | As completed | 11                    | 2                           |
| <b><math>\pi</math>-SnS</b>                               |              |                       |                             |
| D1: Mo/ $\pi$ -SnS/CdS/i-ZnO/ITO                          | As completed | 1                     | 5                           |
| D2: Mo/ $\pi$ -SnS/CdS/i-ZnO/ITO                          | As completed | 11                    | 9                           |
| E1: FTO/ $\pi$ -SnS/CdS/i-ZnO/ITO                         | As completed | 9                     | 6                           |
| E2: FTO/ $\pi$ -SnS/CdS/i-ZnO/ITO                         | As completed | 0                     | 10                          |
| F1: FTO/am-TiO <sub>x</sub> / $\pi$ -SnS/CdS/i-ZnO/ITO    | As completed | 0                     | 6                           |
| F2: FTO/am-TiO <sub>x</sub> / $\pi$ -SnS/CdS/i-ZnO/ITO    | As completed | 9                     | 9                           |

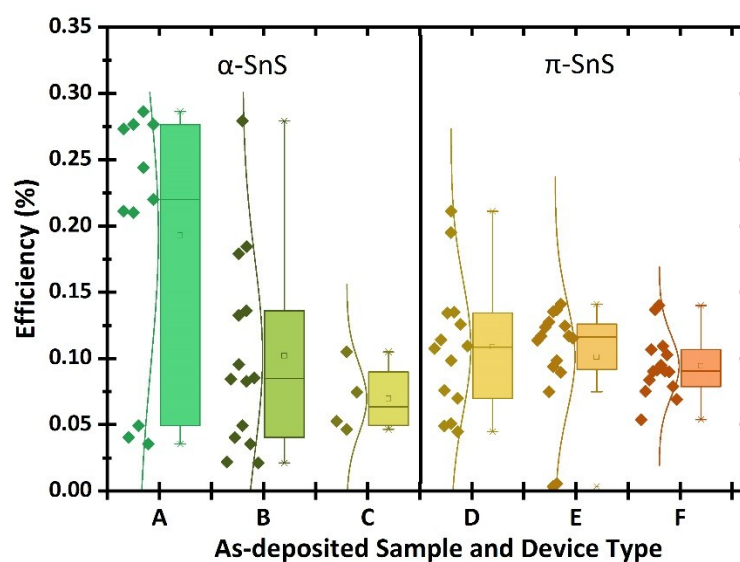

**Fig. S1** Statistical box plot for the distribution of solar conversion efficiencies for individual pixels within as-deposited samples consisting of device structures A, B, C, D, E, and F.

## Supporting Information

**Table S2:** Summary of all measured  $\alpha$ -SnS and  $\pi$ -SnS PV devices under an AM 1.5G illumination with different post fabrication hot plate annealing treatments.

| Device Structure                                                       | Post Fabrication Hot Plate Annealing Method | V <sub>oc</sub> (mV) | J <sub>sc</sub> (mA cm <sup>-2</sup> ) | FF (%)    | Area (cm <sup>-2</sup> ) | $\eta$ (%)  |
|------------------------------------------------------------------------|---------------------------------------------|----------------------|----------------------------------------|-----------|--------------------------|-------------|
| <b><math>\alpha</math>-SnS</b>                                         |                                             |                      |                                        |           |                          |             |
| A: Mo/ $\alpha$ -SnS/CdS/i-ZnO/ITO                                     | As completed                                | 170                  | 3.81                                   | 45        | 0.1                      | 0.29        |
| <b>A: Mo/<math>\alpha</math>-SnS/CdS/i-ZnO/ITO</b>                     | <b>200 °C, 20 min</b>                       | <b>135</b>           | <b>12.96</b>                           | <b>47</b> | <b>0.1</b>               | <b>0.82</b> |
| A: Mo/ $\alpha$ -SnS/CdS/i-ZnO/ITO                                     | 200 °C, 40 min                              | 100                  | 8.01                                   | 43        | 0.1                      | 0.35        |
| B: FTO/ $\alpha$ -SnS/CdS/i-ZnO/ITO                                    | As completed                                | 160                  | 4.26                                   | 40        | 0.1                      | 0.28        |
| <b>B: FTO/<math>\alpha</math>-SnS/CdS/i-ZnO/ITO</b>                    | <b>200 °C, 20 min</b>                       | <b>144</b>           | <b>12.78</b>                           | <b>48</b> | <b>0.1</b>               | <b>0.88</b> |
| B: FTO/ $\alpha$ -SnS/CdS/i-ZnO/ITO                                    | 200 °C, 40 min                              | 95                   | 7.91                                   | 43        | 0.1                      | 0.32        |
| <b>C: FTO/am-TiO<sub>x</sub>/<math>\alpha</math>-SnS/CdS/i-ZnO/ITO</b> | <b>As completed</b>                         | <b>85</b>            | <b>3.74</b>                            | <b>31</b> | <b>0.1</b>               | <b>0.1</b>  |
| C: FTO/am-TiO <sub>x</sub> / $\alpha$ -SnS/CdS/i-ZnO/ITO               | 200 °C, 20 min                              | -                    | -                                      | -         | -                        | Shunted     |
| C: FTO/am-TiO <sub>x</sub> / $\alpha$ -SnS/CdS/i-ZnO/ITO               | 200 °C, 40 min                              | -                    | -                                      | -         | -                        | Shunted     |
| <b><math>\pi</math>-SnS</b>                                            |                                             |                      |                                        |           |                          |             |
| <b>D: Mo/<math>\pi</math>-SnS/CdS/i-ZnO/ITO</b>                        | <b>As completed</b>                         | <b>133</b>           | <b>5.93</b>                            | <b>27</b> | <b>0.1</b>               | <b>0.21</b> |
| D: Mo/ $\pi$ -SnS/CdS/i-ZnO/ITO                                        | 150 °C, 20 min                              | -                    | -                                      | -         | -                        | Shunted     |
| E: FTO/ $\pi$ -SnS/CdS/i-ZnO/ITO                                       | As completed                                | 180                  | 2.00                                   | 40        | 0.1                      | 0.14        |
| E: FTO/ $\pi$ -SnS/CdS/i-ZnO/ITO                                       | 150 °C, 120 min                             | 128                  | 2.59                                   | 41        | 0.1                      | 0.14        |
| <b>E: FTO/<math>\pi</math>-SnS/CdS/i-ZnO/ITO</b>                       | <b>150 °C, 240 min</b>                      | <b>113</b>           | <b>3.40</b>                            | <b>42</b> | <b>0.1</b>               | <b>0.15</b> |
| F: FTO/am-TiO <sub>x</sub> / $\pi$ -SnS/CdS/i-ZnO/ITO                  | As completed                                | 180                  | 2.50                                   | 32        | 0.1                      | 0.14        |
| F: FTO/am-TiO <sub>x</sub> / $\pi$ -SnS/CdS/i-ZnO/ITO                  | 150 °C, 120 min                             | 200                  | 3.50                                   | 31        | 0.1                      | 0.22        |
| <b>F: FTO/am-TiO<sub>x</sub>/<math>\pi</math>-SnS/CdS/i-ZnO/ITO</b>    | <b>150 °C, 240 min</b>                      | <b>217</b>           | <b>5.40</b>                            | <b>34</b> | <b>0.1</b>               | <b>0.41</b> |

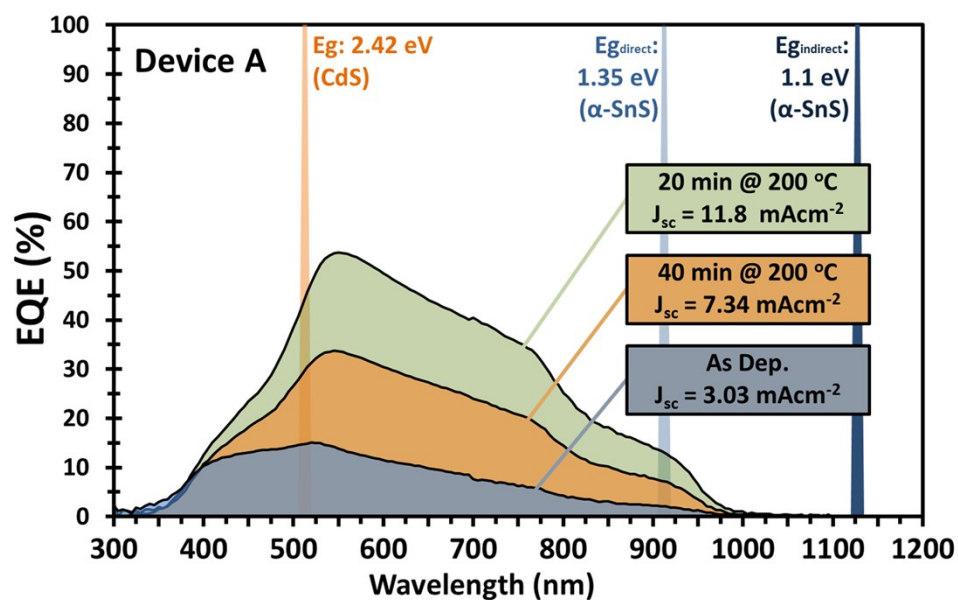

**Fig. S2** External quantum efficiency (EQE) vs photon wavelength for device A consisting of Mo/ $\alpha$ -SnS/CdS/ZnO/ITO. The EQE measurements after consecutive hot plate annealing treatments are presented.

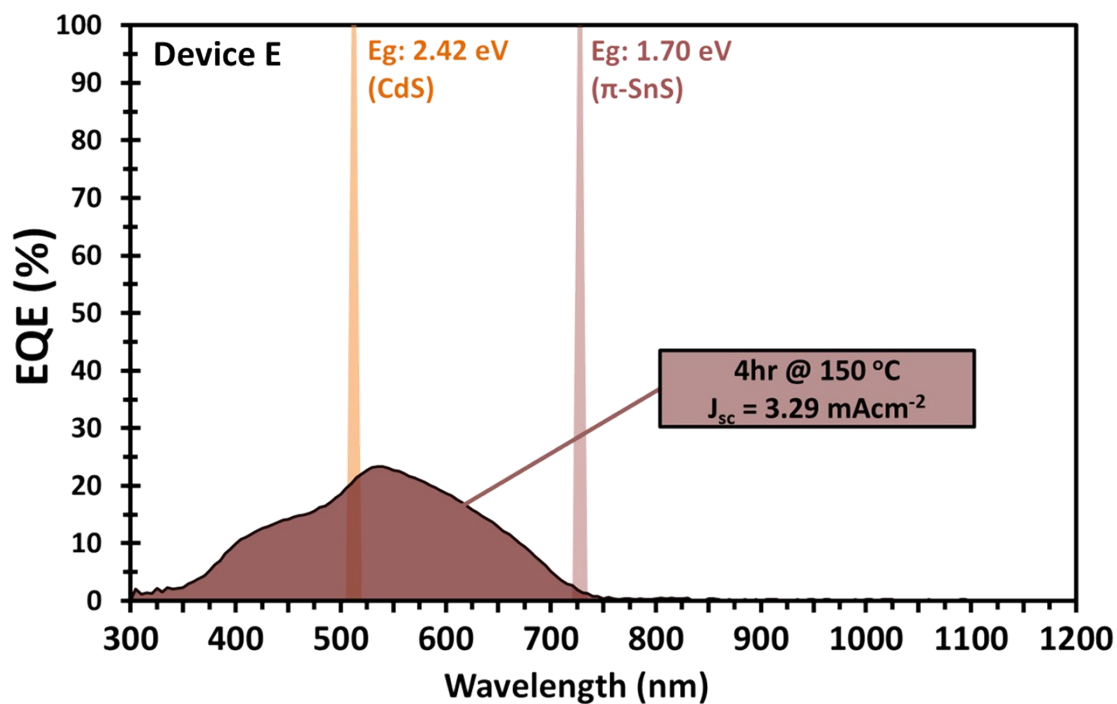

**Fig. S3** The EQE vs photon wavelength for Device E after hotplate annealing at 150 °C for 4 hours

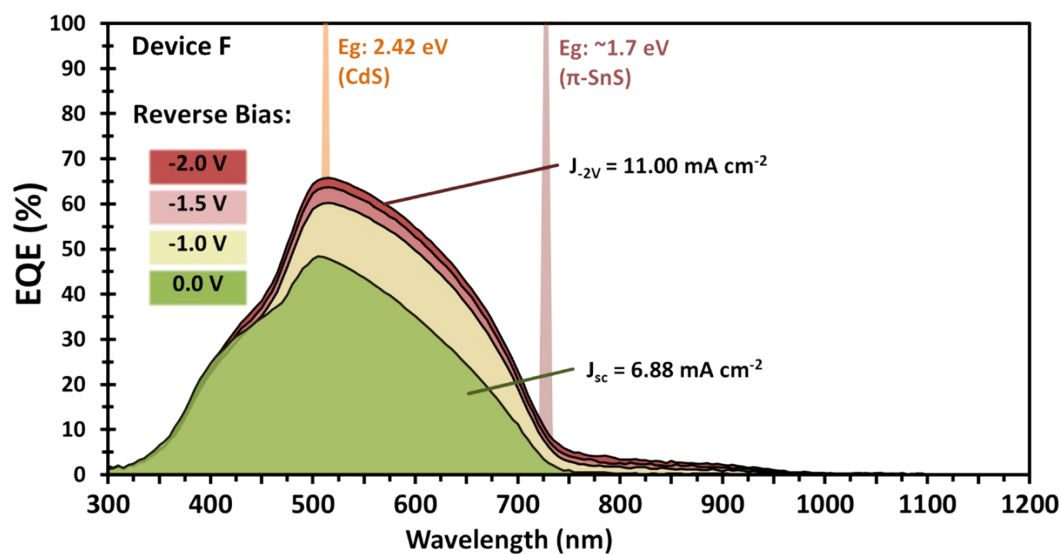

**Fig. S4** The EQE vs photon wavelength for Device F after hotplate annealing at 150 °C for 4 hours at different reverse bias potentials from 0 V to -2 V.

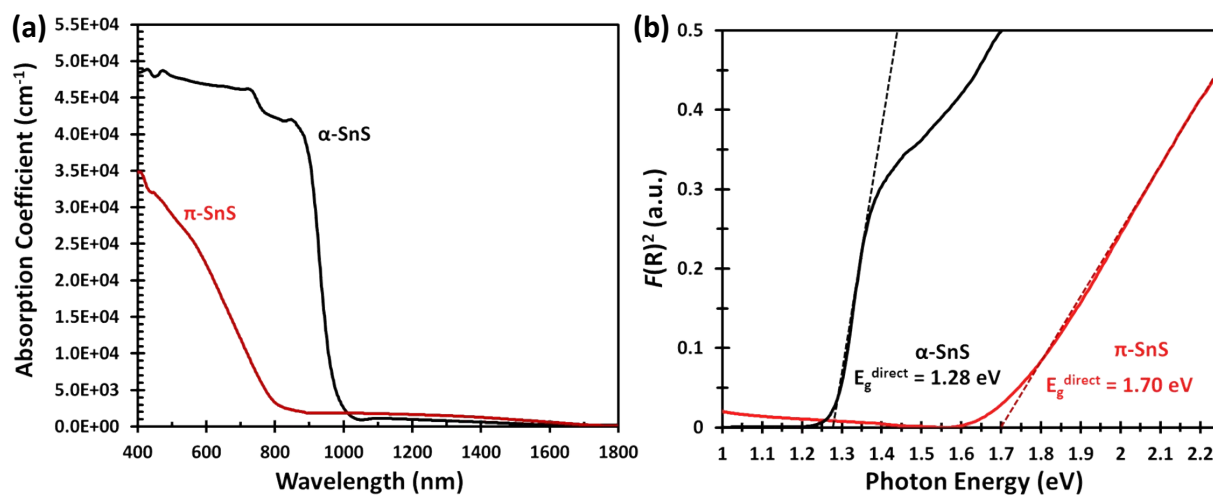

**Fig. S5** (a) absorption coefficient vs. wavelength and (b) Tauc plot of the Kubelka–Munck function for direct allowed transitions, determined from the UV-Vis-NIR transreflectance measurements for  $\alpha$ -SnS and  $\pi$ -SnS samples deposited on to glass.

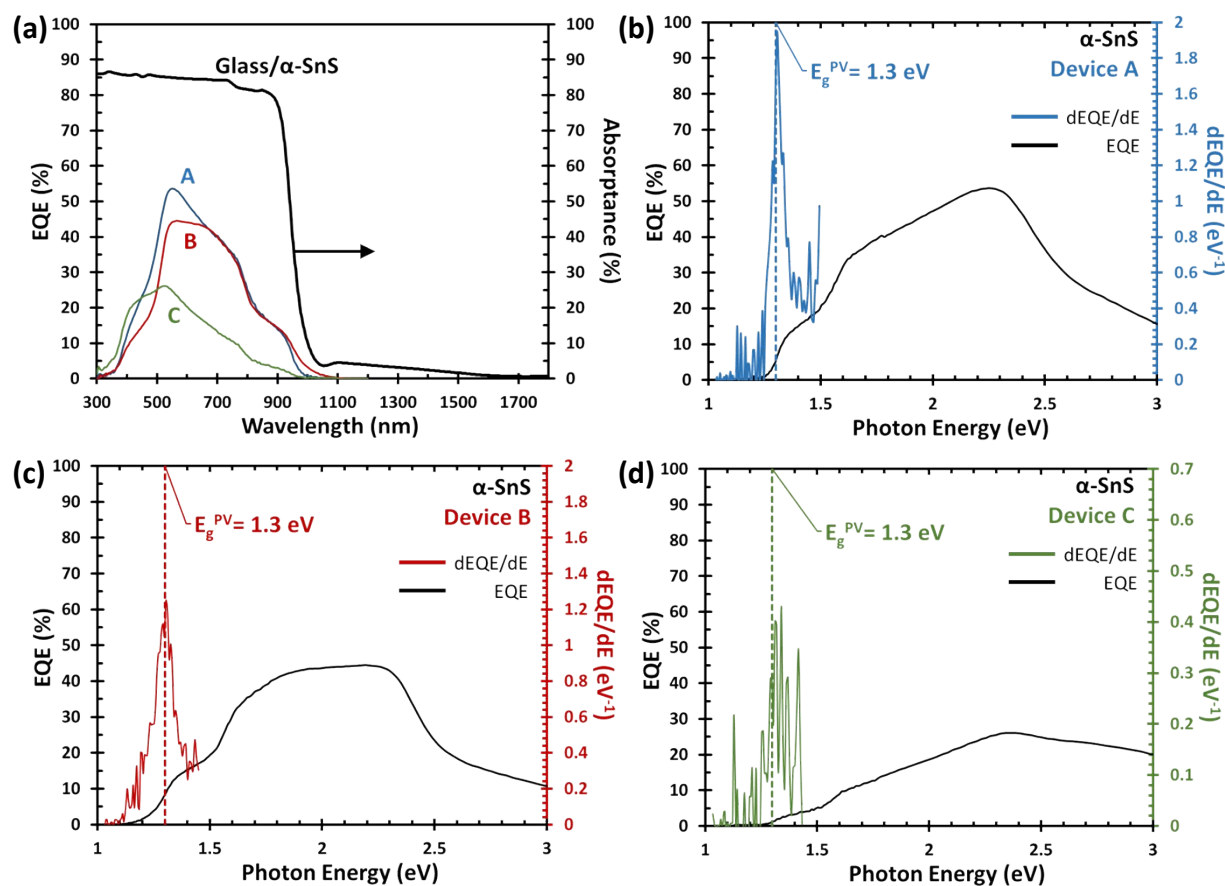

**Fig. S6** (a) Combined absorbance data for  $\alpha$ -SnS samples deposited onto glass (black) and the EQE data for optimized devices A (blue), B (red), and C (green) vs. wavelength. Measured EQE data (black) and its derivative (coloured) vs. photon energy, for devices consisting of  $\alpha$ -SnS, (b)A, (c)B, and (d)C. The photovoltaic (PV) band gap ( $E_g^{PV}$ ) is determined from the maximum point of the derivative,  $dEQE/dE$ .

# Supporting Information

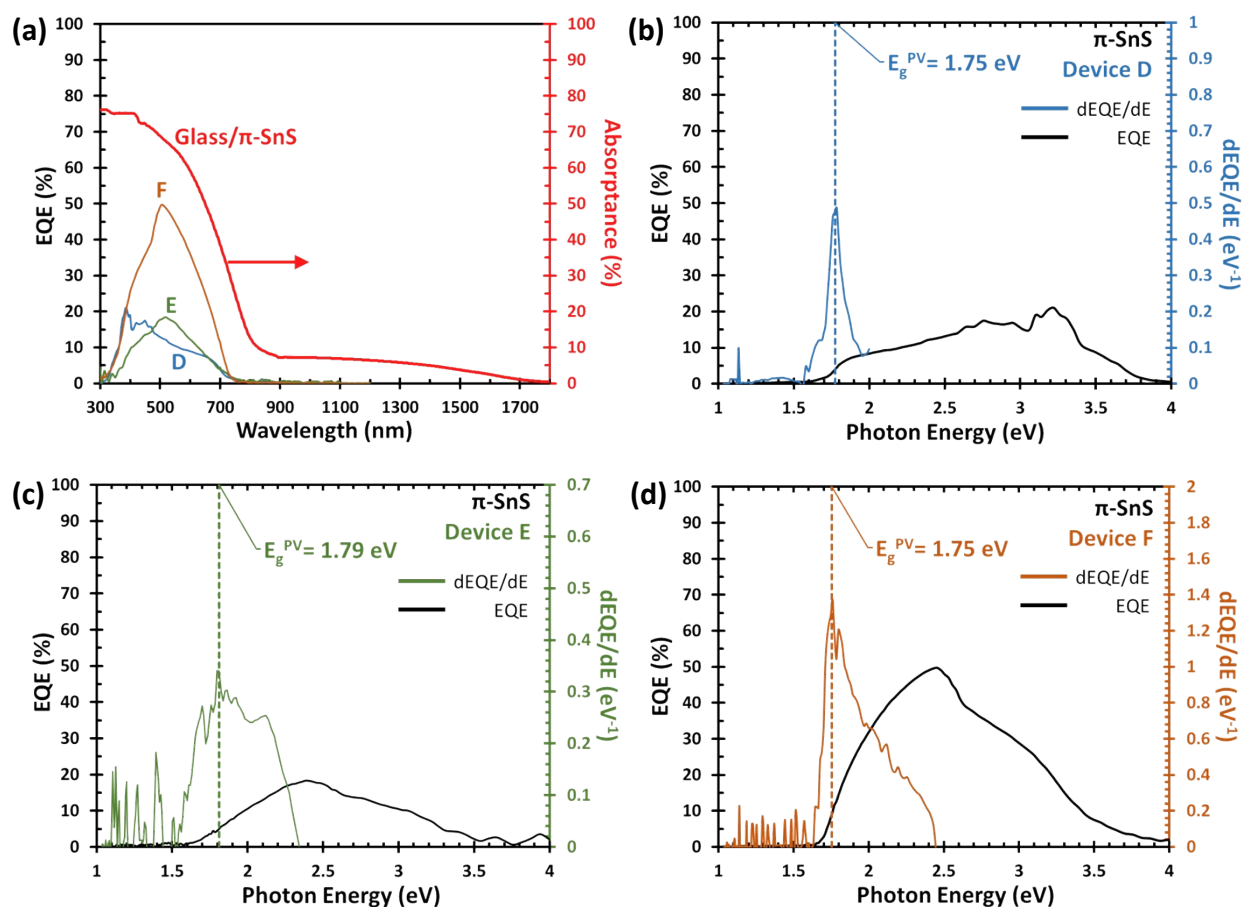

**Fig. S7** (a) Combined absorbance data for  $\pi$ -SnS samples deposited onto glass (red) and the EQE data for optimized devices D (blue), E (green), and F (orange) vs. wavelength. Measured EQE data (black) and its derivative (coloured) vs. photon energy, for devices consisting of  $\pi$ -SnS, (b)D, (c)E, and (d)F. The photovoltaic (PV) band gap ( $E_g^{PV}$ ) is determined from the maximum point of the derivative,  $dEQE/dE$ .

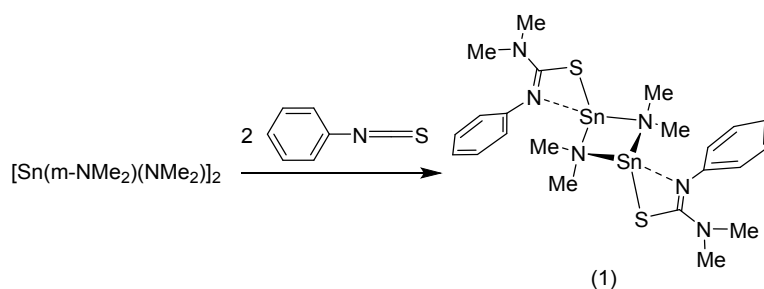

**Scheme S1** Synthesis route to Dimethylamido-(N-Phenyl-N',N'-Dimethyl-Thiouriate)Sn(II) dimer  $[\text{Sn}\{\{\text{C}_6\text{H}_5\}\text{NCSN}\{\text{Me}_2\}}(\text{NMe}_2)]_2$ , the Sn(II) thio-ureide single source precursor (**1**).<sup>1</sup>

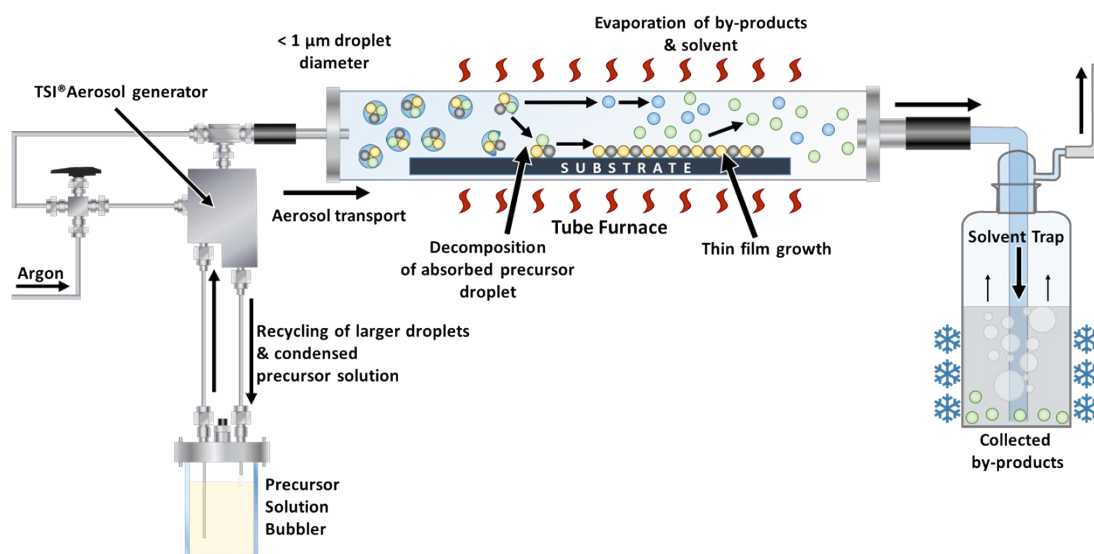

**Fig. S8** Schematic of the aerosol assisted chemical vapor deposition (AA-CVD) apparatus used in this study. The aerosol was generated from a TSI® 3076 Aerosol generator.

#### References:

1. I. Y. Ahmet, M. S. Hill, A. L. Johnson and L. M. Peter, *Chemistry of Materials*, 2015, **27**, 7680-7688.
